# Supplementary material for: Flow virometry analysis of envelope glycoprotein conformations on individual HIV virions
Source: PubMed Central journal article supplement (PMC5430429; doi:10.1038/s41598-017-00935-w), 2017-04-19
Supplement: 41598_2017_935_MOESM1_ESM.pdf [file 41598_2017_935_MOESM1_ESM.pdf]

## Supplementary material

### Flow virometry analysis of envelope glycoprotein conformations on individual HIV virions

Anush Arakelyan<sup>1</sup>, Wendy Fitzgerald<sup>1</sup>, Deborah F. King<sup>2</sup>, Paul Rogers<sup>2</sup>,  
Hannah M. Cheeseman<sup>2</sup>, Jean-Charles Grivel<sup>1</sup> ,  
Robin J. Shattock<sup>2</sup> and Leonid Margolis<sup>1</sup>

<sup>1</sup>Section of Intercellular Interactions, Eunice Kennedy Shriver National Institute of Child Health and Human Development, National Institutes of Health, Bethesda, Maryland and

<sup>2</sup>Mucosal Infection & Immunity Group, Department of Medicine, Imperial College, London, UK.

bioRxiv preprint doi: <https://doi.org/10.1101/2017.07.26.177111>; this version posted July 26, 2017. The copyright holder for this preprint (which was not certified by peer review) is the author/funder, who has granted bioRxiv a license to display the preprint in perpetuity. It is made available under aCC-BY-NC-ND 4.0 International license.

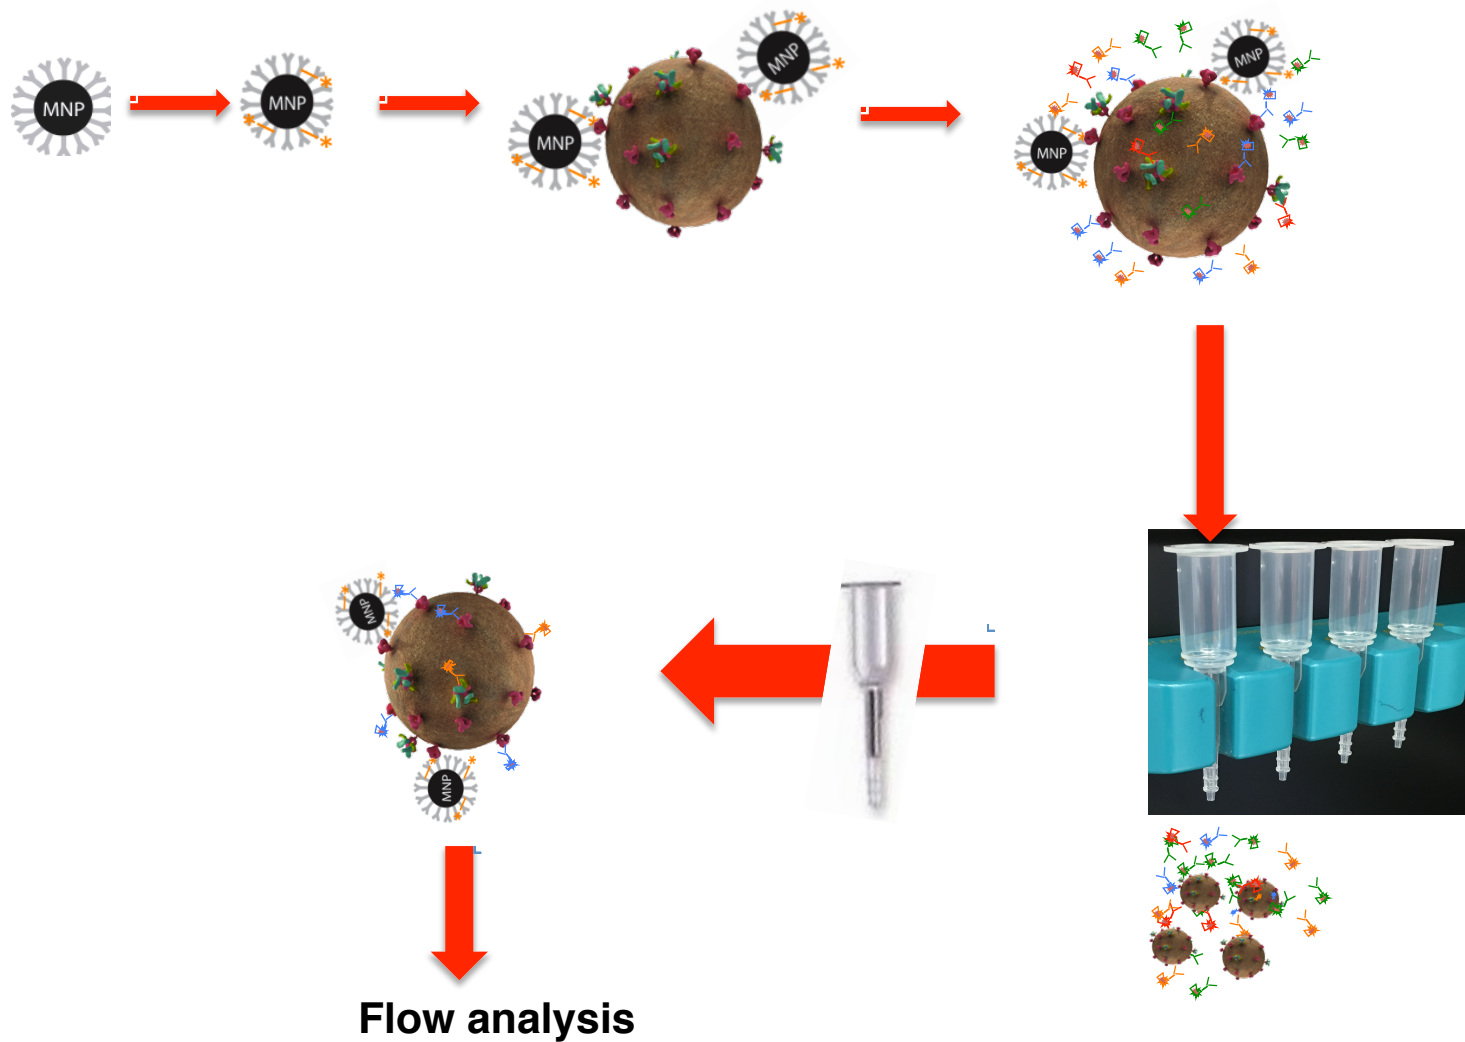

### Figure S1. Principle of flow virometry of individual HIV

Magnetic nanoparticles (MNPs) coupled with anti-HIV antibodies were stained with fluorescent anti-human IgG1 Fab fragments. HIV virions were captured with antibody-coupled MNPs and the resultant complexes stained with fluorescent monoclonal antibodies against antigens of interest were separated from free antibodies and non-captured virions in a strong magnetic field using magnetic columns. The eluted complexes were analyzed with a flow cytometer triggered on fluorescence.

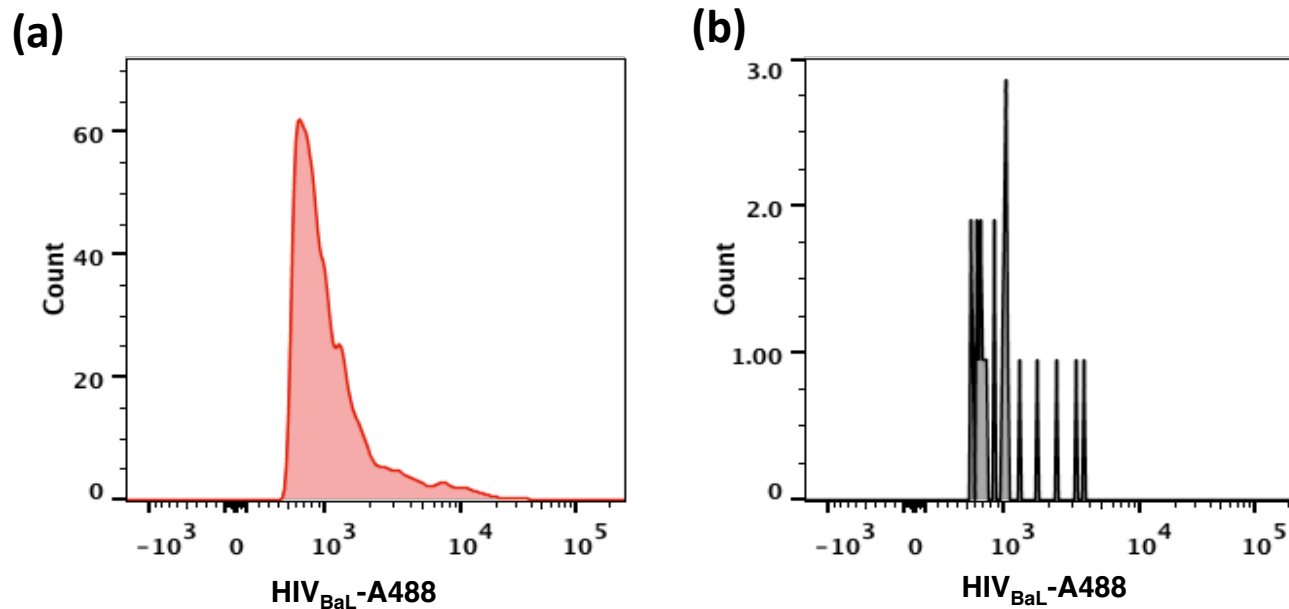

### Figure S2. Efficiency of the MNP capture assay

AlexaFluor 488-labeled HIV-1<sub>BaL</sub> was captured with 2G12-MNPs, isolated on a magnetic column, and analyzed with a flow cytometer (a). The non-captured (flow-through) fraction was captured again with 2G12-MNPs, isolated on a magnetic column, and analyzed on a flow cytometer (b). A representative experiment out of three is shown. 95% of virions were captured and analyzed in the first run.

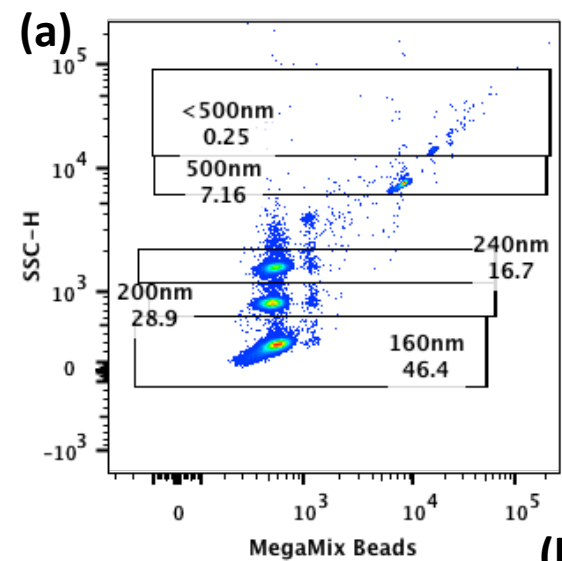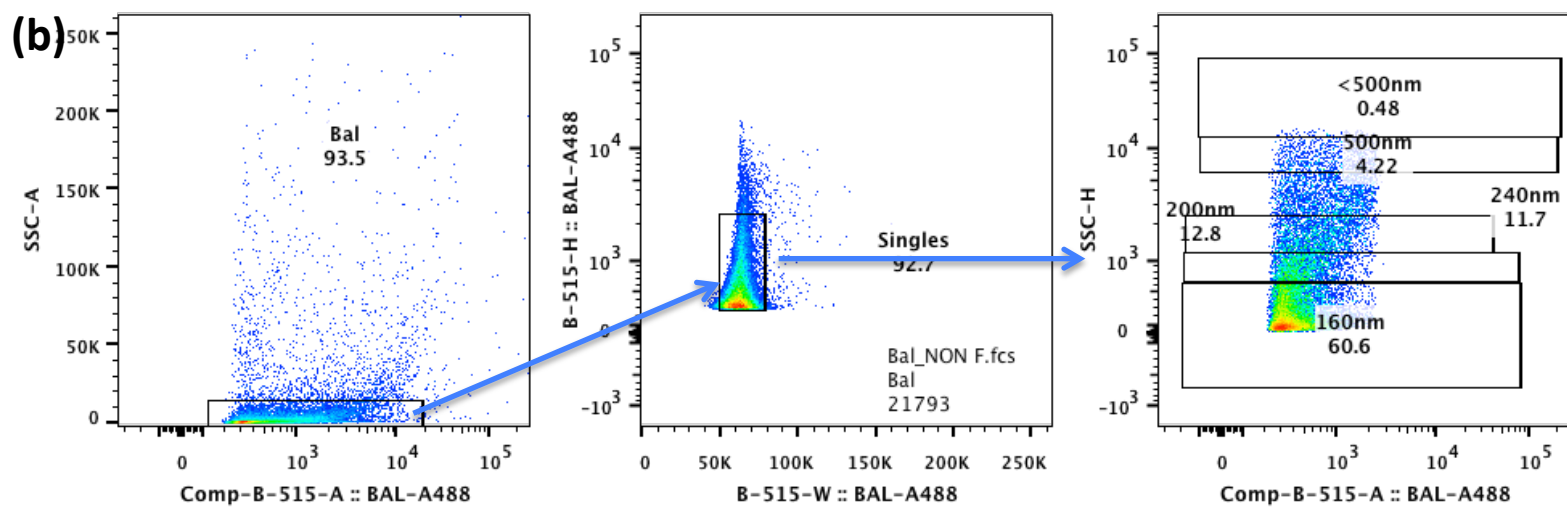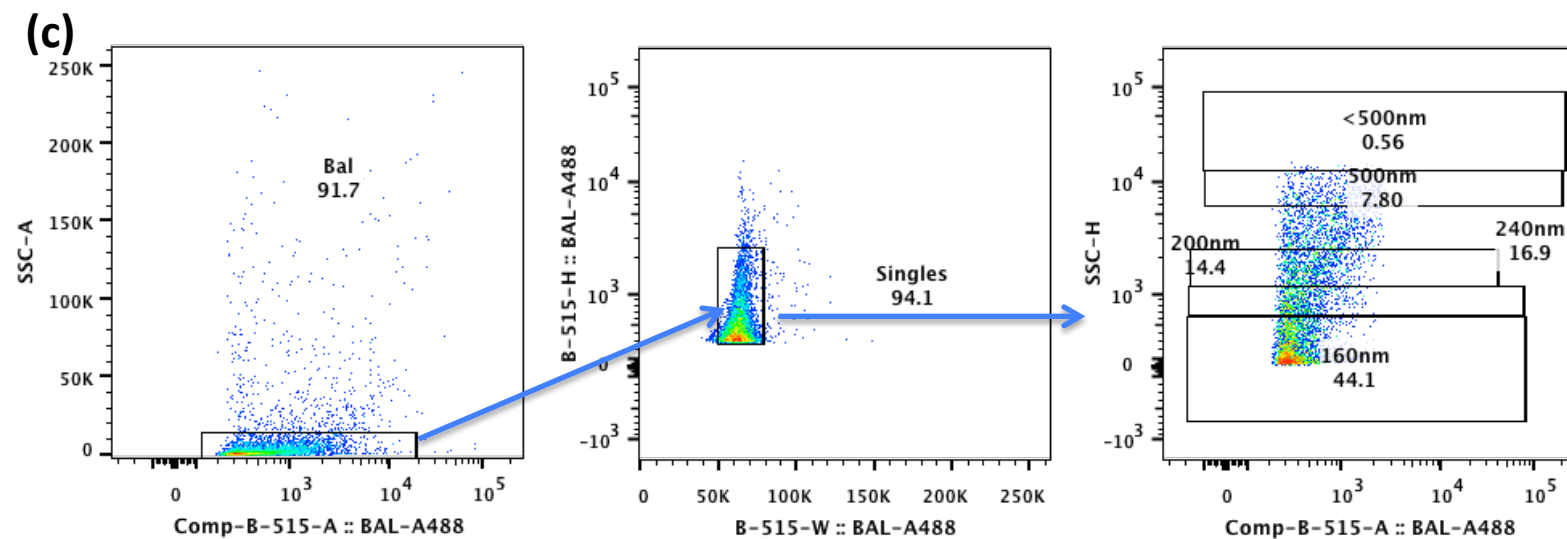

Figure S3 a,b,c

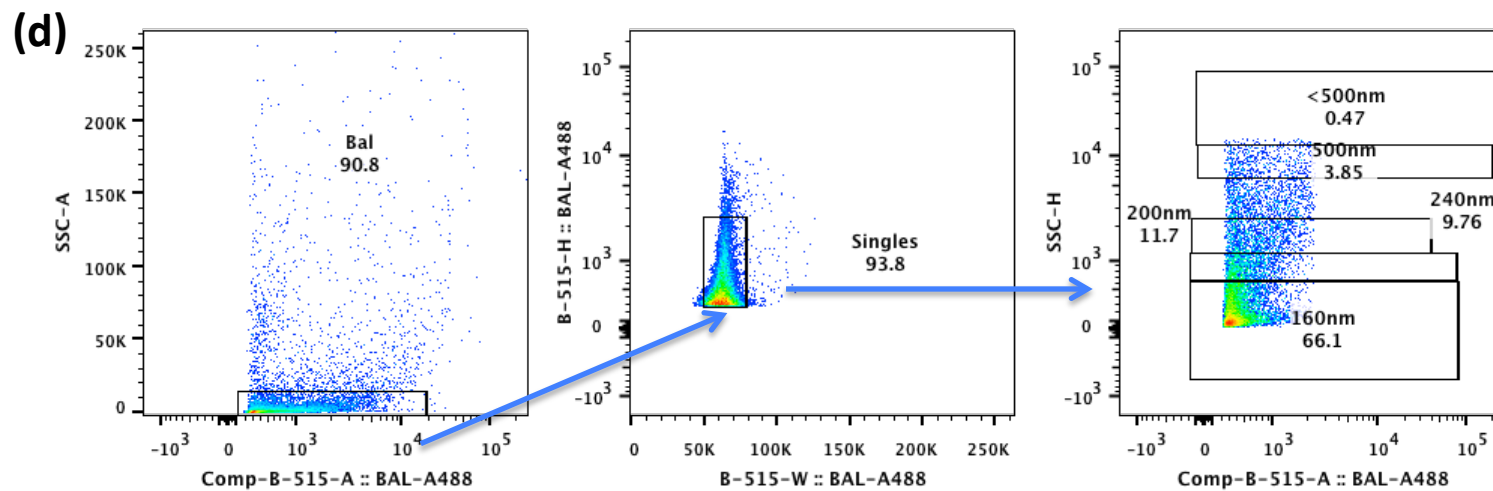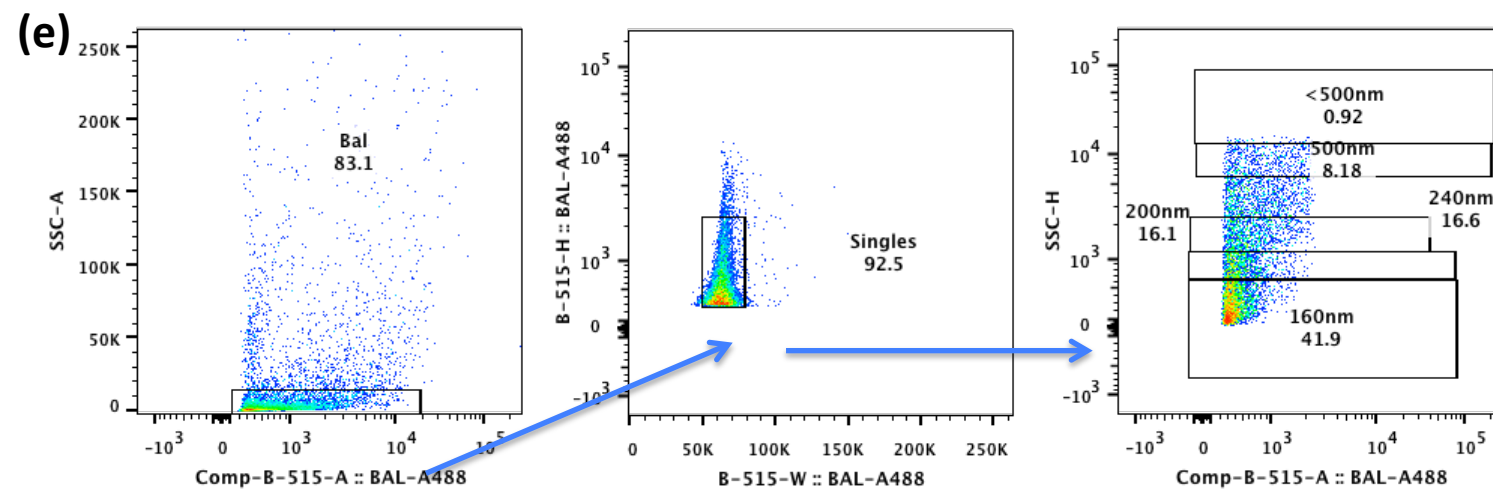

### Figure S3. Sizing of the MNP captured HIV

**(a)** Calibrating beads of different size. **(b)** AlexaFluor 488-labeled HIV-1<sub>BaL</sub> captured with 2G12-MNPs, isolated on a magnetic column, and analyzed with a flow cytometer. **(c)** AlexaFluor 488-labeled HIV-1<sub>BaL</sub> was filtered through a 0.22 $\mu$ m filter, captured with 2G12-MNPs, isolated on a magnetic column, and analyzed with a flow cytometer. **(d)** AlexaFluor 488-labeled HIV-1<sub>BaL</sub> captured with 2G12-MNPs stained with PG9 antibodies, isolated on a magnetic column, and analyzed with a flow cytometer. **(e)** AlexaFluor 488-labeled HIV-1<sub>BaL</sub> was filtered through 0.22 $\mu$ m filter, captured with 2G12-MNPs, stained with PG9 antibodies, isolated on a magnetic column, and analyzed with a flow cytometer.

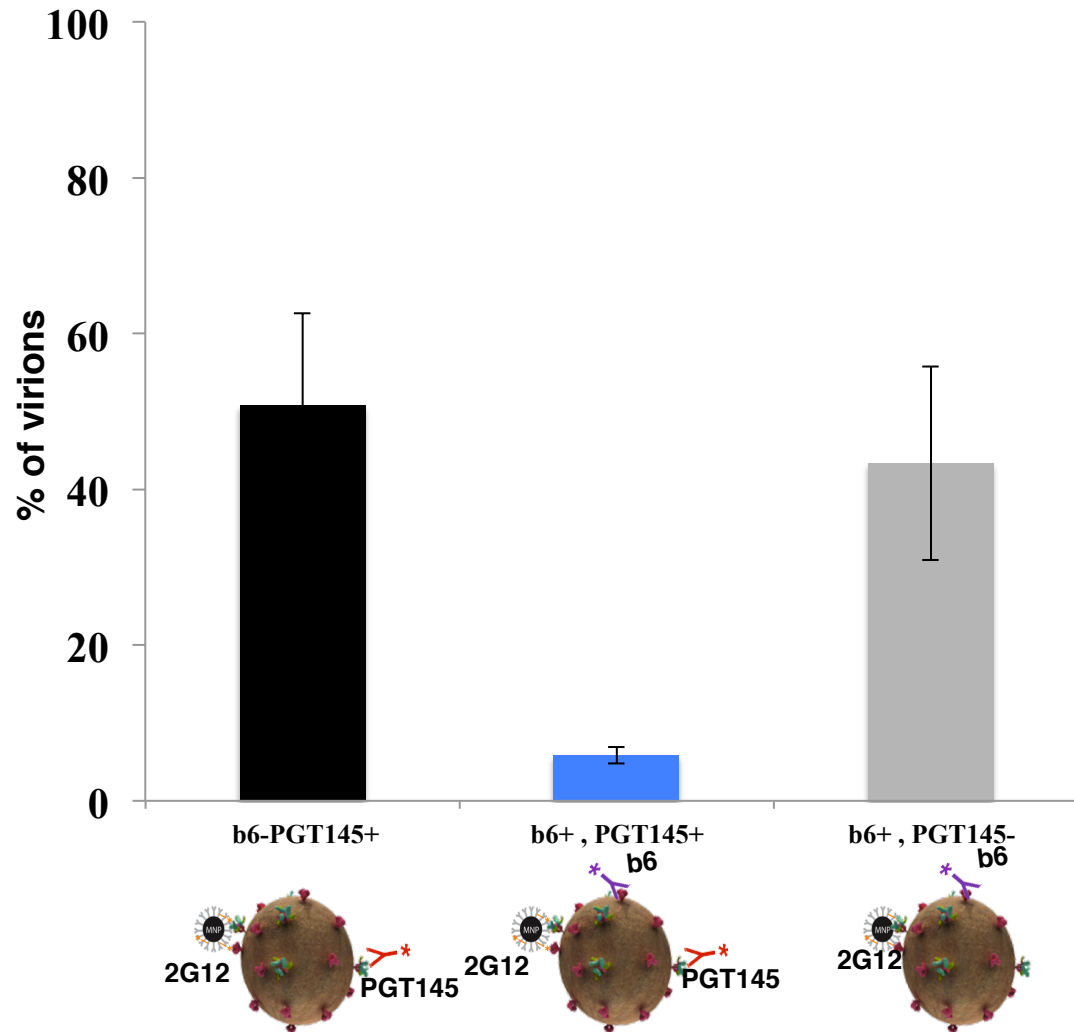

**Figure S4. Flow virometry of HIV-1<sub>BaL</sub> virions captured with 2G12-MNPs**  
 Distribution of 2G12-captured virions positive for PGT145 and/or for b6. Each bar represents mean  $\pm$  SEM of three experiments.

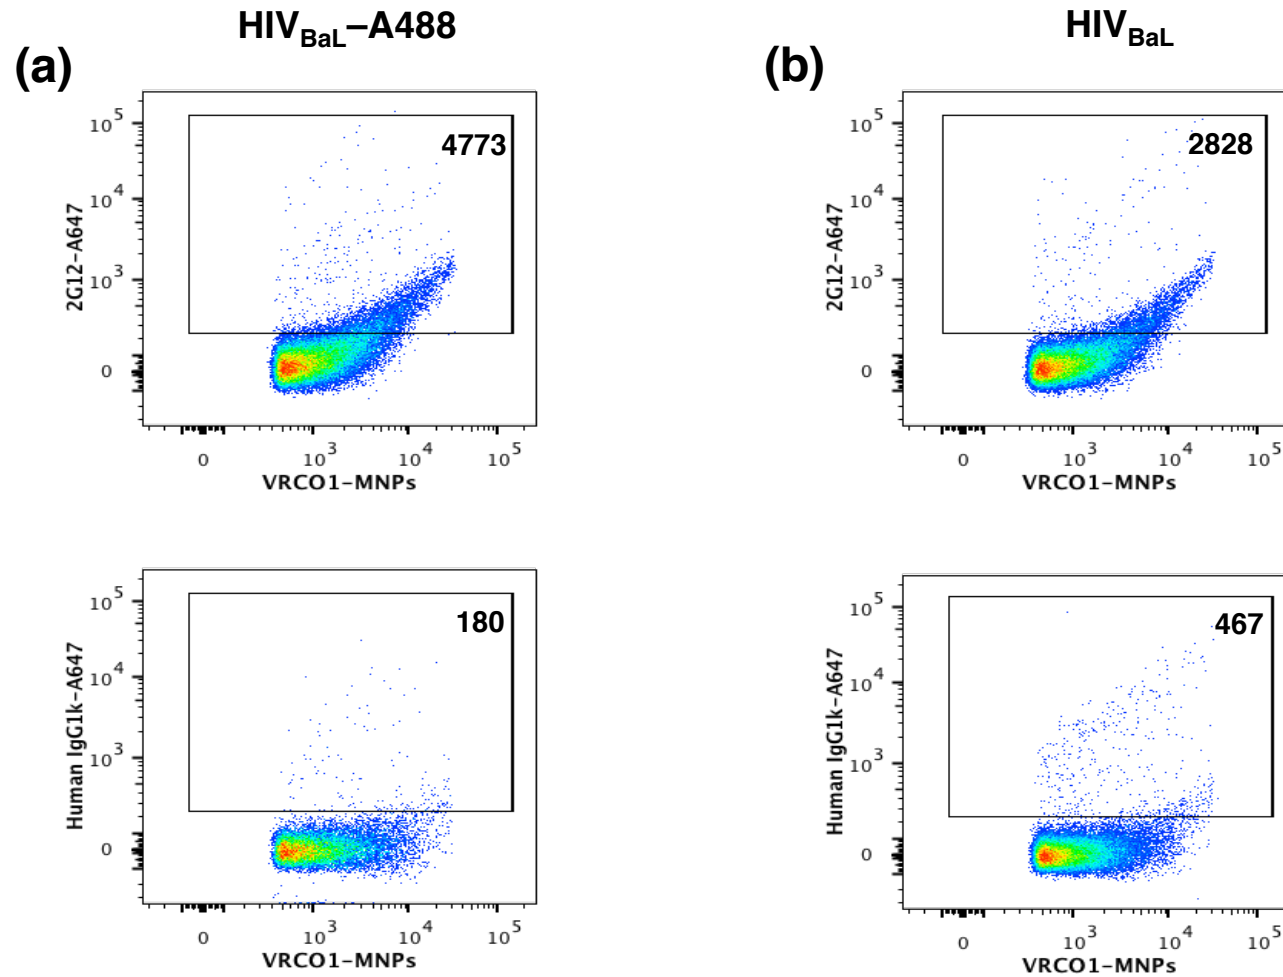

**Figure S5. Comparison of Alexa Fluor -labeled and unlabeled HIV-1<sub>BaL</sub> virions**  
 Virions labeled with Alexa Fluor 488 as described in Methods (a) or non-labeled virions (b) were captured with VRCO1-MNPs and revealed with AlexaFluor 647-labeled 2G12 antibodies (upper panels) or with the isotype control AlexaFluor 647-labeled antibodies (lower panels).

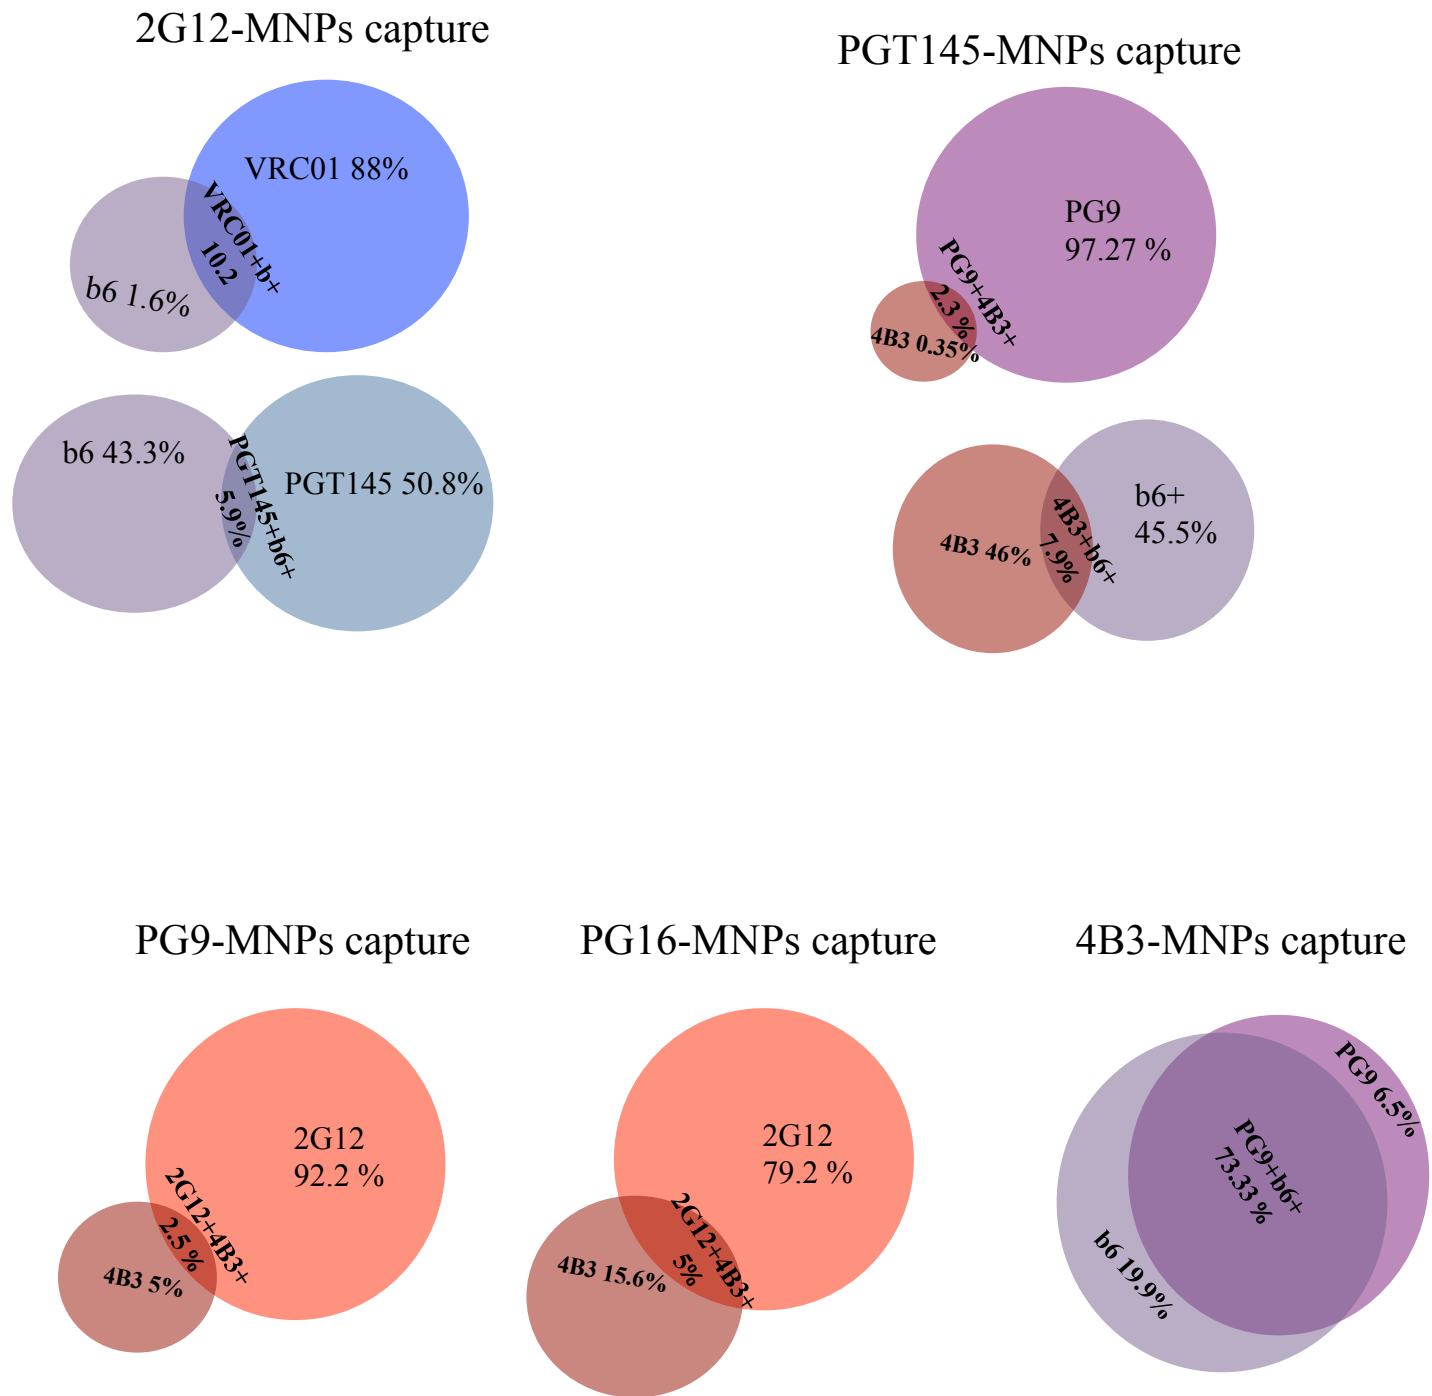

**Figure S6. Venn Diagrams of HIV virions carrying various Env conformations**



| <b>MNPs</b> | <b>Detection Abs</b> |         |
|-------------|----------------------|---------|
| 2G12        | VRC01                | b6      |
| 2G12        | PGT145               | b6      |
| PGT145      | PG9                  | 4B3     |
| PGT145      | b6                   | 4B3     |
| PG9         | 2G12                 | 4B3     |
| PG16        | 2G12                 | 4B3     |
| 4B3         | PG9                  | b6      |
| VRC01       | PGT151               | b6, 4B3 |
| PGT145      | PGT151               | b6, 4B3 |

### **Table S1. Capture and detection antibodies**

In the left column of the table shown are capture antibodies. In the two right columns shown are detection antibodies.

2G12 recognize clusters of high mannose type glycans on the outer domain of gp120<sup>18,23</sup>; VRC01 preferentially recognizes the CD4 binding site (CD4bs) on all gp120<sup>19</sup>; b6 preferentially recognizes the CD4bs<sup>20,22</sup> on uncleaved gp160 as well as non-trimeric forms of gp120; PGT145 binds to quaternary epitope at the V2 apex; PG9 and PG16<sup>21</sup> preferentially recognize quaternary epitopes that are trimer- and glycan-dependent and which bind to the V2 apex; 4B3 recognizes cluster I on gp41<sup>17</sup>; PGT151 recognizes quaternary, cleavage-dependent epitope at the gp41-gp120 interface<sup>24</sup>.

| Pairs of detection antibodies | Competition Coefficient (CC)                  |
|-------------------------------|-----------------------------------------------|
| VRC01/b6                      | [VRC01] 1.3±0.1(n=2)<br>[b6] 1.6±0.1(n=2)     |
| PG9/4B3                       | [PG9] 1.6±0.3(n=3)<br>[4B3] 1.2±0.6(n=3)      |
| PGT145/b6                     | [PGT145] 1.3±0.3(n=3)<br>[b6] 1.0±0.3(n=3)    |
| PGT145/4B3                    | [PGT145] 0.8±0.08(n=2)<br>[4B3] 1.4±0.01(n=2) |
| 4B3/b6                        | [4B3] 1.6±0.3(n=3)<br>[b6] 1.1±0.3(n=3)       |
| PG9/PGT145                    | [PGT145] 1.0±0.2(n=2)<br>[PG9] 0.4±0.02(n=2)  |

**Table S2.** To check the possible competition between different detection antibodies used in the present work we captured virions with MNPs coupled to 2G12 (that have a broad recognition pattern) and stained with various detection antibodies used either alone or in combinations. As a positive control we tested PG9 and PGT145 to closely –situated epitopes. Presented in the table are competition coefficients (CC) calculate as  $N_{al}/N_{comb}$  where  $N_{al}$  is the number of positive events when a particular antibody was used alone and  $N_{comb}$  the number of positive events when this antibody was used in combination with the second one. CC=1 indicates no competition between two antibodies. Presented are means ± SEM of replicates or triplicate for each experimental condition. Note that a combination of PGT145 and PG9 antibodies was not used for detection in the present work but presented as a positive control for the competition assay since these antibodies bind to very closely-situated epitopes on Env .
